# Supplementary material for: Aneurysmal Subarachnoid Hemorrhage in Hospitalized Patients on Anticoagulants—A Two Center Matched Case-Control Study
Source: MDPI journal article supplement (doi:10.3390/jcm12041476), 2023-02-13
Supplement: s1 [file s1]

## Supplemental Table S1.

|                            | OR     | 95% CI          | p-value |
|----------------------------|--------|-----------------|---------|
| NOAC use                   | 0.633  | 0.135 to 2.961  | 0.562   |
| DCI occurrence             | 5.333  | 0.343 to 82.827 | 0.232*  |
| Mechanical ventilation     | 2.057  | 0.575 to 7.364  | 0.268*  |
| Sepsis                     | 0.333  | 0.028 to 3.990  | 0.386*  |
| WFNS grading (dichotomous) | 7.500  | 1.715 to 32.796 | 0.007   |
|                            | OR     | 95% CI          | p-value |
| VKA                        | 3.067  | 0.869 to 10.823 | 0.081   |
| DCI occurrence             | 1.280  | 0.457 to 3.585  | 0.639*  |
| Mechanical ventilation     | 12.042 | 3.079 to 47.088 | < 0.001 |
| Sepsis                     | 1.133  | 0.277 to 4.629  | 0.862*  |
| WFNS grading (dichotomous) | 9.200  | 2.882 to 29.364 | < 0.001 |

**Supplemental Table S1.** Results of univariate logistic regression assessing the effect of direct oral anticoagulant (DOAC) or vitamin K antagonist (VKA) treatment on the occurrence of unfavorable outcome (GOS<sub>1-3</sub>) after 12 months.

CI, confidence interval; DCI, delayed cerebral ischemia; DOAC, direct oral anticoagulants; GOS, Glasgow outcome scale, OR, odds ratio; VKA, vitamin K antagonists; WFNS, world federation of neurosurgical societies.

\* These explanatory variables were still included into the multivariate logistic regression model based on their clinical relevance and anticipated effect on outcome.

## Supplemental Table S2.

|                            | OR     | 95% CI           | p-value |
|----------------------------|--------|------------------|---------|
| DOAC use                   | 2.696  | 0.300 to 24.228  | 0.376   |
| DCI occurrence             | 8.290  | 0.940 to 73.122  | 0.057   |
| Mechanical ventilation     | 2.497  | 0.414 to 15.053  | 0.318   |
| Sepsis                     | 8.287  | 0.194 to 354.160 | 0.270   |
| WFNS grading (dichotomous) | 11.047 | 1.520 to 80.286  | 0.018   |
|                            | OR     | 95% CI           | p-value |
| VKA use                    | 2.780  | 0.631 to 12.234  | 0.176   |
| DCI occurrence             | 1.016  | 0.285 to 3.643   | 0.980   |
| Mechanical ventilation     | 6.769  | 1.483 to 30.892  | 0.014   |
| Sepsis                     | 1.207  | 0.205 to 7.104   | 0.043   |
| WFNS grading (dichotomous) | 4.833  | 1.376 to 16.977  | 0.014   |

**Supplemental Table S2.** Results of multivariable logistic regression assessing the effect of direct oral anticoagulant (DOAC) or vitamin K antagonist (VKA) treatment on the occurrence of unfavorable outcome (GOS<sub>1-3</sub>) after 12 months.

CI, confidence interval; DCI, delayed cerebral ischemia; DOAC, direct oral anticoagulants; GOS, Glasgow outcome scale, OR, odds ratio; VKA, vitamin K antagonists; WFNS, world federation of neurosurgical societies.
